# Supplementary material for: A shortcut to garnet-type fast Li-ion conductors for all-solid state batteries
Source: Royal Society of Chemistry journal article supplement (doi:10.1039/c5ta03239c), 2015-01-01
Supplement: c5ta03239c1.pdf [file c5ta03239c1.pdf]

## Supplementary Information for “A Shortcut to Garnet-type Fast Li-Ion Conductors for All Solid State Batteries”

By Semih Afyon<sup>\*a</sup>, Frank Krumeich<sup>b</sup>, and Jennifer L. M. Rupp<sup>\*a</sup>

**Supplementary Table 1.** Indexed Powder XRD of c-Li<sub>6.4</sub>Ga<sub>0.2</sub>La<sub>3</sub>Zr<sub>2</sub>O<sub>12</sub> (obtained at 650 °C) using Werner's algorithm (TREOR).

wavelength : 1.540598

Number of accepted peaks : 36

Crystal system : Cubic or lower  
Maximum cell edge : 15.0  
Maximum cell volume : 3000.0  
2Theta window : 0.050

Maximum unindexed lines for refinement : 0  
Required Figure of Merit : 5.0

selected solution

|          |         |         |         |        |      |           |
|----------|---------|---------|---------|--------|------|-----------|
| Symmetry | a       | b       | c       | Volume | FOM  | unindexed |
| Cubic    | 12.9744 | 12.9744 | 12.9744 | 2184.0 | 16.9 | 0         |

Peak list

| N  | 2Th(obs) | H  | K | L | 2Th(calc) | obs-calc | Int   | d(obs)  | d(calc) |
|----|----------|----|---|---|-----------|----------|-------|---------|---------|
| 1  | 16.7250  | 2  | 1 | 1 | 16.7241   | 0.00089  | 85.8  | 5.29650 | 5.29678 |
| 2  | 19.3405  | 2  | 2 | 0 | 19.3345   | 0.00604  | 14.8  | 4.58572 | 4.58714 |
| 3  | 25.6789  | 3  | 2 | 1 | 25.6701   | 0.00884  | 64.9  | 3.46638 | 3.46756 |
| 4  | 27.4845  | 4  | 0 | 0 | 27.4760   | 0.00848  | 53.0  | 3.24262 | 3.24360 |
| 5  | 30.8062  | 4  | 2 | 0 | 30.7950   | 0.01124  | 100.0 | 2.90013 | 2.90117 |
| 6  | 32.3536  | 3  | 3 | 2 | 32.3382   | 0.01541  | 8.4   | 2.76487 | 2.76615 |
| 7  | 33.8310  | 4  | 2 | 2 | 33.8184   | 0.01262  | 81.2  | 2.64743 | 2.64839 |
| 8  | 35.2579  | 5  | 1 | 0 | 35.2436   | 0.01434  | 6.2   | 2.54348 | 2.54449 |
| 9  | 37.9675  | 5  | 2 | 1 | 37.9538   | 0.01375  | 46.5  | 2.36796 | 2.36879 |
| 10 | 42.9502  | 6  | 1 | 1 | 42.9365   | 0.01373  | 43.2  | 2.10408 | 2.10473 |
| 11 | 44.1170  | 6  | 2 | 0 | 44.1096   | 0.00742  | 6.3   | 2.05111 | 2.05143 |
| 12 | 47.5029  | 6  | 3 | 1 | 47.4906   | 0.01232  | 9.0   | 1.91250 | 1.91297 |
| 13 | 48.5927  | 4  | 4 | 4 | 48.5771   | 0.01563  | 9.2   | 1.87213 | 1.87269 |
| 14 | 50.7096  | 6  | 4 | 0 | 50.6976   | 0.01197  | 31.2  | 1.79883 | 1.79923 |
| 15 | 51.7437  | 5  | 5 | 2 | 51.7340   | 0.00971  | 20.2  | 1.76528 | 1.76559 |
| 16 | 52.7655  | 6  | 4 | 2 | 52.7558   | 0.00974  | 58.6  | 1.73348 | 1.73378 |
| 17 | 55.7524  | 7  | 3 | 2 | 55.7423   | 0.01006  | 11.8  | 1.64748 | 1.64775 |
| 18 | 56.7220  | 8  | 0 | 0 | 56.7142   | 0.00782  | 14.9  | 1.62160 | 1.62180 |
| 19 | 59.5832  | 6  | 5 | 3 | 59.5679   | 0.01533  | 4.8   | 1.55038 | 1.55074 |
| 20 | 60.5251  | 8  | 2 | 2 | 60.5004   | 0.02473  | 2.3   | 1.52848 | 1.52905 |
| 21 | 63.2570  | 7  | 5 | 2 | 63.2487   | 0.00834  | 3.6   | 1.46889 | 1.46906 |
| 22 | 64.1536  | 8  | 4 | 0 | 64.1498   | 0.00381  | 13.3  | 1.45051 | 1.45058 |
| 23 | 65.9340  | 8  | 4 | 2 | 65.9320   | 0.00201  | 14.1  | 1.41559 | 1.41562 |
| 24 | 66.8189  | 7  | 6 | 1 | 66.8137   | 0.00516  | 7.1   | 1.39897 | 1.39907 |
| 25 | 67.6938  | 6  | 6 | 4 | 67.6897   | 0.00407  | 10.3  | 1.38300 | 1.38308 |
| 26 | 68.5505  | 7  | 5 | 4 | 68.5603   | -0.00977 | 1.7   | 1.36779 | 1.36762 |
| 27 | 70.2879  | 7  | 6 | 3 | 70.2861   | 0.00179  | 6.4   | 1.33818 | 1.33821 |
| 28 | 72.0068  | 7  | 7 | 0 | 71.9935   | 0.01327  | 1.8   | 1.31040 | 1.31061 |
| 29 | 73.6806  | 7  | 7 | 2 | 73.6846   | -0.00396 | 3.2   | 1.28472 | 1.28466 |
| 30 | 77.0164  | 7  | 6 | 5 | 77.0249   | -0.00851 | 6.5   | 1.23718 | 1.23706 |
| 31 | 79.4945  | 8  | 6 | 4 | 79.5004   | -0.00590 | 10.7  | 1.20472 | 1.20464 |
| 32 | 80.3130  | 10 | 3 | 3 | 80.3209   | -0.00793 | 3.7   | 1.19449 | 1.19439 |
| 33 | 81.1261  | 10 | 4 | 2 | 81.1395   | -0.01337 | 9.6   | 1.18456 | 1.18440 |
| 34 | 83.5747  | 11 | 2 | 1 | 83.5849   | -0.01018 | 5.3   | 1.15597 | 1.15585 |
| 35 | 84.3828  | 8  | 8 | 0 | 84.3972   | -0.01439 | 6.9   | 1.14694 | 1.14679 |
| 36 | 86.8126  | 7  | 7 | 6 | 86.8280   | -0.01542 | 4.2   | 1.12098 | 1.12082 |

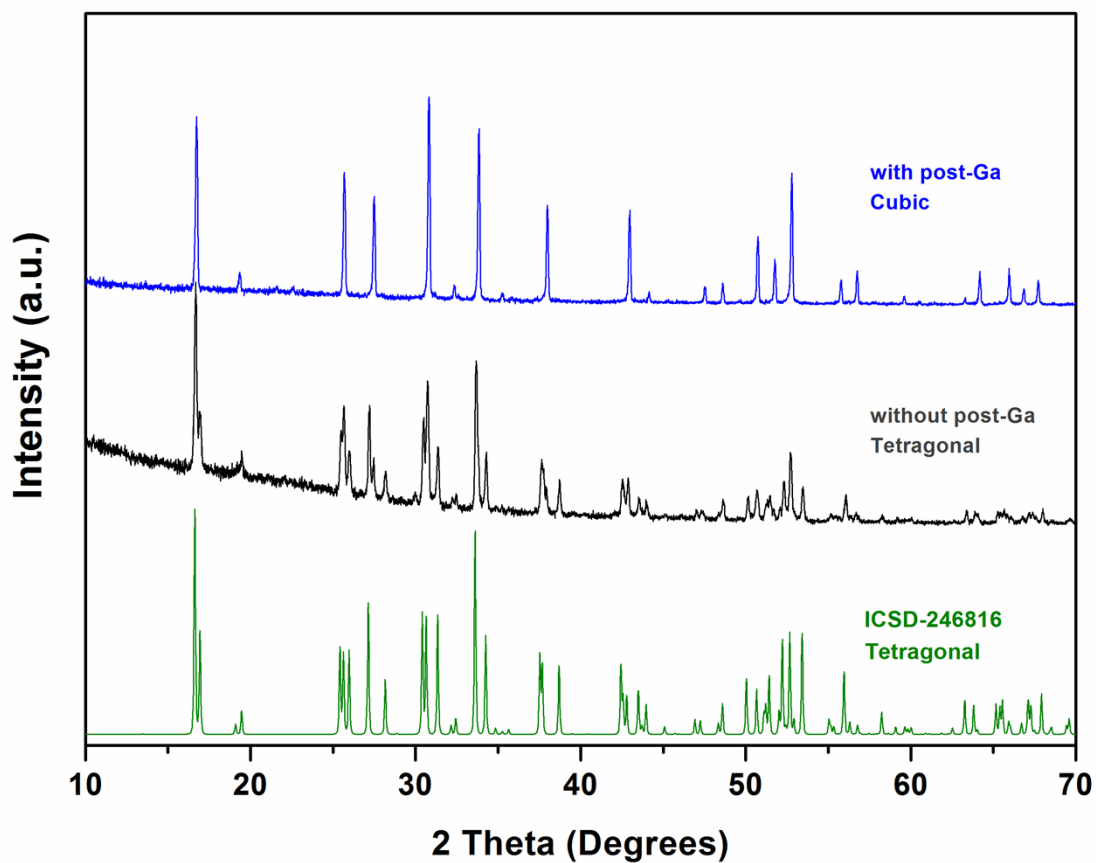

**Supplementary Figure S1.** XRD powder patterns of the re-annealed  $\text{Li}_7\text{La}_3\text{Zr}_2\text{O}_{12}$  at 650 °C with (blue) and without (black) post Ga-doping through  $\text{Ga}_2\text{O}_3$ , and the calculated pattern for the tetragonal phase (ICSD 246816).

In order to confirm the influence of post synthetic Ga-doping, already calcined samples are also re-annealed at 650 °C without adding any  $\text{Ga}_2\text{O}_3$ , and in this case, the samples still occurred to be in the tetragonal phase (**Figure S1**).

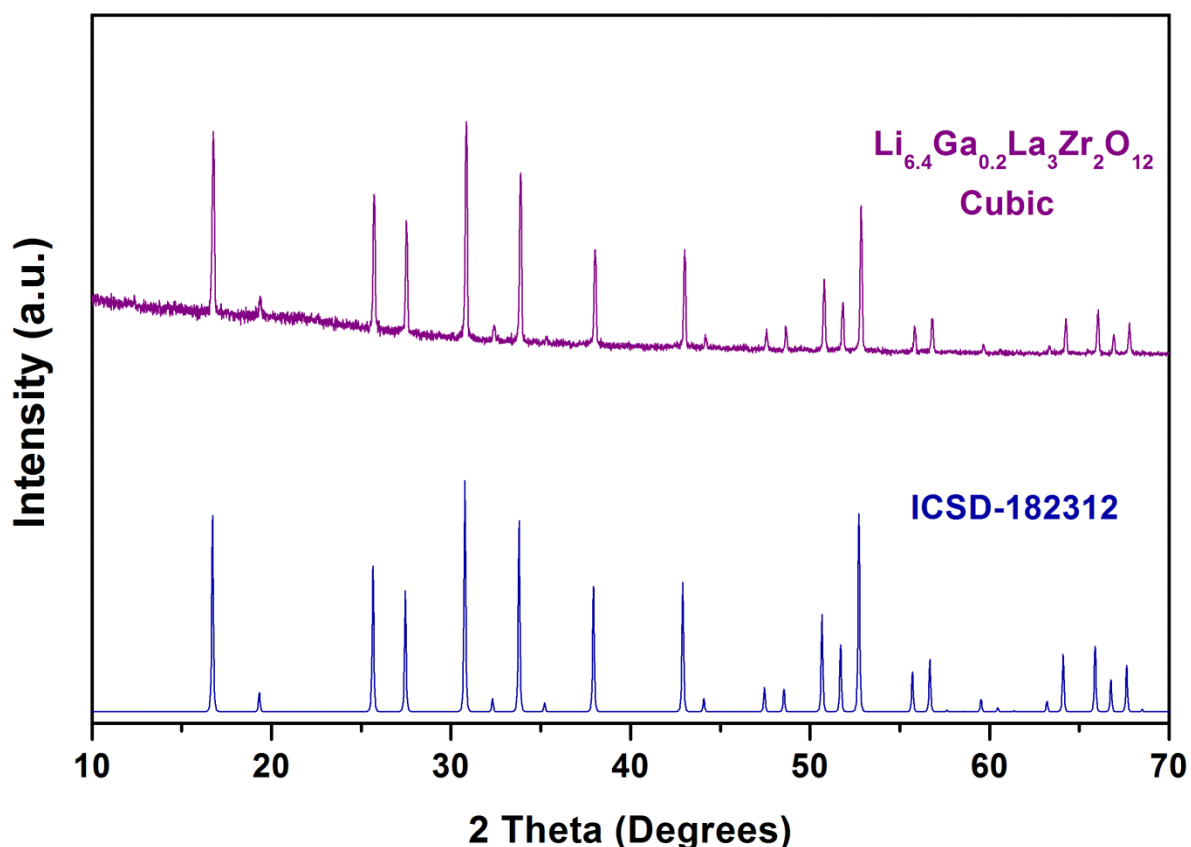

**Supplementary Figure S2.** XRD powder patterns of c-Li<sub>6.4</sub>Ga<sub>0.2</sub>La<sub>3</sub>Zr<sub>2</sub>O<sub>12</sub> obtained through post Ga-doping with Ga<sub>2</sub>O<sub>3</sub> in glassy carbon crucibles (purple), and the calculated pattern for the cubic phase (ICSD 182312) (blue).

To show that any Al<sup>3+</sup> contamination through alumina crucibles have no effect on the phase transformation obtained via post Ga-doping with Ga<sub>2</sub>O<sub>3</sub>, typical syntheses were performed in glassy carbon crucibles rather than alumina crucibles. In a typical synthesis, stoichiometric amounts of Ga<sub>2</sub>O<sub>3</sub> and t-Li<sub>7</sub>La<sub>3</sub>Zr<sub>2</sub>O<sub>12</sub> that would result in a composition of Li<sub>6.4</sub>Ga<sub>0.2</sub>La<sub>3</sub>Zr<sub>2</sub>O<sub>12</sub> are ground in an agate mortar. Annealing Ga<sub>2</sub>O<sub>3</sub> + t-Li<sub>7</sub>La<sub>3</sub>Zr<sub>2</sub>O<sub>12</sub> mixture at ~ 650-800 °C for 10-15 hours under Ar flow in glassy carbon crucibles yields the cubic phase c-Li<sub>6.4</sub>Ga<sub>0.2</sub>La<sub>3</sub>Zr<sub>2</sub>O<sub>12</sub> (**Figure S2**).

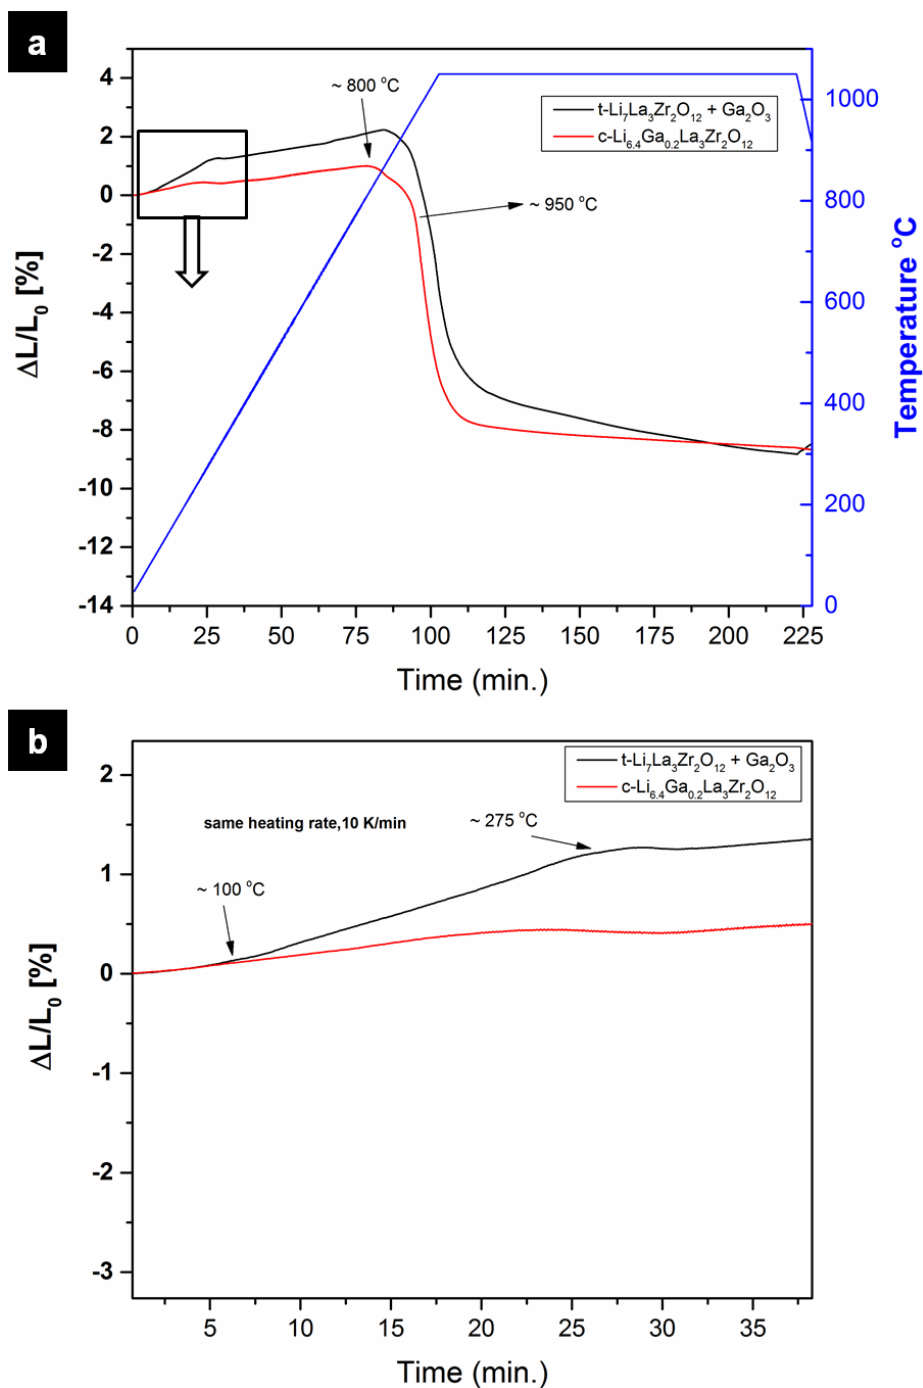

**Supplementary Figure S3. a)** Dilatometry curves for  $\text{t-Li}_7\text{La}_3\text{Zr}_2\text{O}_{12} + \text{Ga}_2\text{O}_3$  and  $\text{c-Li}_{6.4}\text{Ga}_{0.2}\text{La}_3\text{Zr}_2\text{O}_{12}$  displaying the main sintering phases, at a heating rate of  $10^{\circ}\text{C} / \text{min}$ . **b)** the magnified marked region from Figure S2a, comparing the dilatometry curves for  $\text{t-Li}_7\text{La}_3\text{Zr}_2\text{O}_{12} + \text{Ga}_2\text{O}_3$  mixture and  $\text{c-Li}_{6.4}\text{Ga}_{0.2}\text{La}_3\text{Zr}_2\text{O}_{12}$  showing the phase transformation at  $\sim 100^{\circ}\text{C}$ .

Dilatometry curves are displayed for  $t\text{-Li}_7\text{La}_3\text{Zr}_2\text{O}_{12} + \text{Ga}_2\text{O}_3$  and already transformed  $c\text{-Li}_{6.4}\text{Ga}_{0.2}\text{La}_3\text{Zr}_2\text{O}_{12}$  in **Figure S3**. The dilatometry curves confirm the phase transformation at low temperature. A volume expansion starting from  $\sim 100$  °C is observable for a pellet of the  $\text{Ga}_2\text{O}_3 + t\text{-Li}_7\text{La}_3\text{Zr}_2\text{O}_{12}$  mixture that also manifests itself as a broad peak in differential dilatometry curves (**Fig. 2b** main text), whereas such volume changes are not present for the pellets of  $t\text{-Li}_7\text{La}_3\text{Zr}_2\text{O}_{12}$  and already transformed  $c\text{-Li}_{6.4}\text{Ga}_{0.2}\text{La}_3\text{Zr}_2\text{O}_{12}$ . The onset temperature and the main sintering peak for  $c\text{-Li}_{6.4}\text{Ga}_{0.2}\text{La}_3\text{Zr}_2\text{O}_{12}$  pellets are also found to be  $\sim 800$  °C and  $\sim 950\text{-}975$  °C, respectively, which is  $200\text{-}300$  °C lower than the values reported in literature. No sintering can be observed for the tetragonal phase of  $t\text{-Li}_7\text{La}_3\text{Zr}_2\text{O}_{12}$ , and the low ionic conductivities obtained for the tetragonal phase so far could also be linked to this finding.

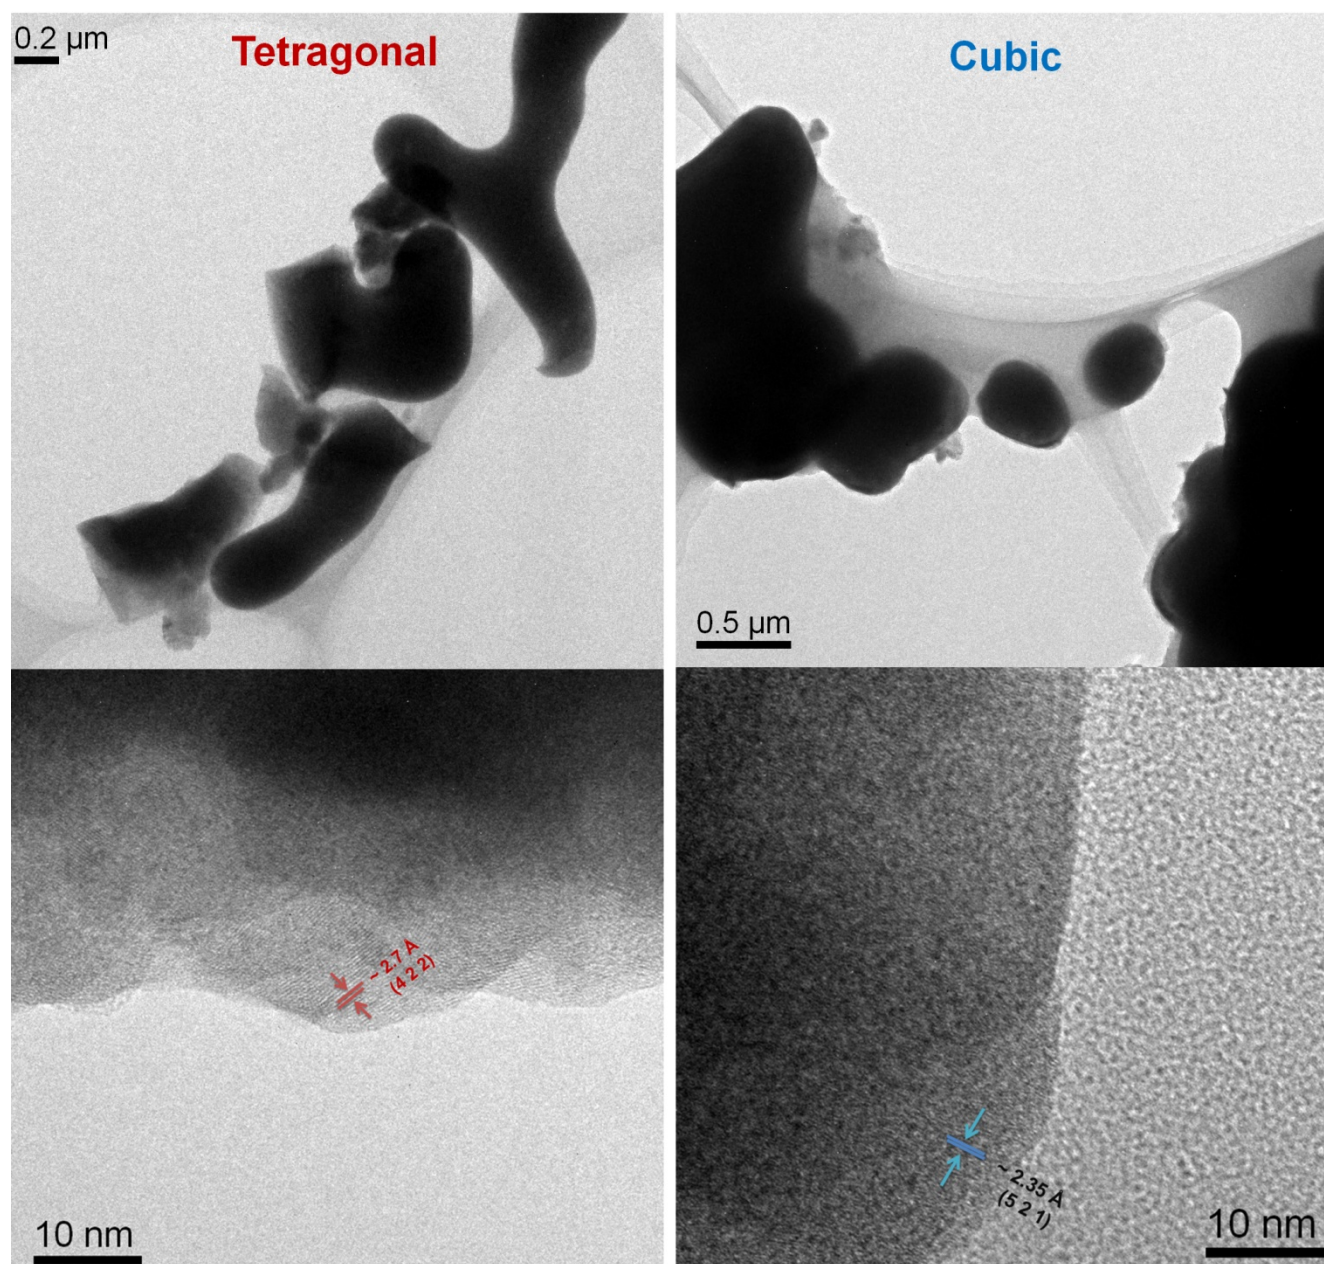

**Supplementary Figure S4.** Transmission electron microscopy images (TEM) of  $t\text{-Li}_7\text{La}_3\text{Zr}_2\text{O}_{12}$  (red) and  $c\text{-Li}_{6.4}\text{Ga}_{0.2}\text{La}_3\text{Zr}_2\text{O}_{12}$  (blue).

Transmission electron microscopy images (TEM) of  $t\text{-Li}_7\text{La}_3\text{Zr}_2\text{O}_{12}$  (red) and  $c\text{-Li}_{6.4}\text{Ga}_{0.2}\text{La}_3\text{Zr}_2\text{O}_{12}$  (blue) are shown in **Figure S4**.  $t\text{-Li}_7\text{La}_3\text{Zr}_2\text{O}_{12}$  appears as elongated particles in the range of 300 nm to 1  $\mu\text{m}$  with no well-defined shapes. With the phase transformation to the cubic phase, the spherical nano-crystallites of  $c\text{-Li}_{6.4}\text{Ga}_{0.2}\text{La}_3\text{Zr}_2\text{O}_{12}$  that are mostly in the



range of  $\sim 200 - 300$  nm can be observed in TEM images. The lattice fringes corresponding to the marked planes could also be found in high resolution images.

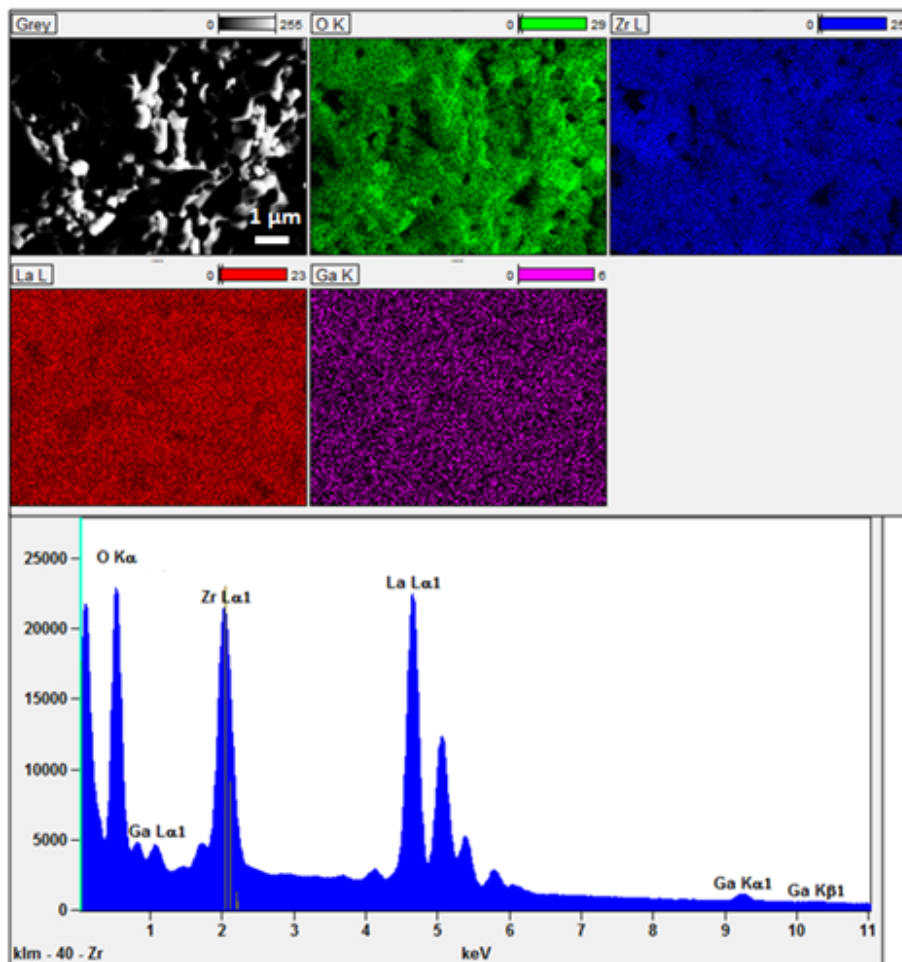

| Element Line | Net Counts | Net Error  | k-ratio (calc.) | Element wt-% | wt-% error | Theoretical wt-% |
|--------------|------------|------------|-----------------|--------------|------------|------------------|
| O_K          | 277517     | $\pm 2001$ | 0.138           | 24.04        | $\pm 0.17$ | 23.85            |
| Ga_L         | 23461      | $\pm 1120$ | 0.012           | 2.25         | $\pm 0.11$ | 1.73             |
| Zr_L         | 443627     | $\pm 2597$ | 0.234           | 23.59        | $\pm 0.14$ | 22.66            |
| La_L         | 732578     | $\pm 3680$ | 0.616           | 50.12        | $\pm 0.25$ | 51.76            |

**Supplementary Figure S5.** SEM-EDXS analysis of  $\text{c-Li}_{6.4}\text{Ga}_{0.2}\text{La}_3\text{Zr}_2\text{O}_{12}$  pellet cross-sectional surface (sintering at  $950^\circ\text{C}$  for 6 hours). Elemental mapping of cubic  $\text{c-Li}_{6.4}\text{Ga}_{0.2}\text{La}_3\text{Zr}_2\text{O}_{12}$  and EDX spectrum from the selected area are presented. The homogeneous distribution of O (green), Zr (blue), La (red) and Ga (purple) are shown. Theoretical elemental ratios given in the table are calculated based on  $\text{Li}_{6.4}\text{Ga}_{0.2}\text{La}_3\text{Zr}_2\text{O}_{12}$  formula.

**Figure S5** shows SEM-EDXS analysis performed at c- $\text{Li}_{6.4}\text{Ga}_{0.2}\text{La}_3\text{Zr}_2\text{O}_{12}$  pellet cross-sectional surface after sintering to 950 °C for 6 hours. A homogeneous distribution of elements is also found here, and again, no enrichment neither in the bulk grain cores nor towards the grain boundary-close interfaces are measurable within the limits of the technique and elemental mapping carried out. Besides, a composition in close proximity to the intended initial compound ( $\text{Li}_{6.4}\text{Ga}_{0.2}\text{La}_3\text{Zr}_2\text{O}_{12}$ ) is found, but, still, we should note that elemental analysis from EDX spectrum should be evaluated in a qualitative basis, so further studies (e.g. ICP-OES) that is the beyond the scope of current work may help to find out the exact composition of processed pellets.



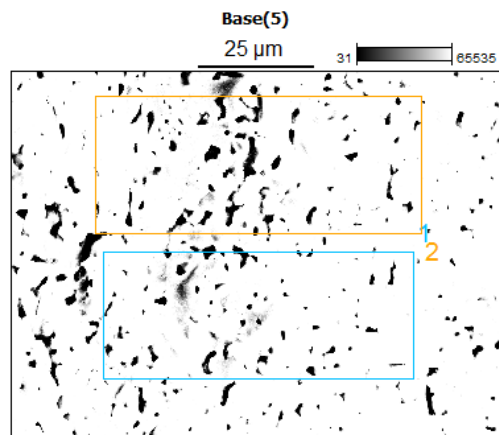

Full scale counts: 19557

Base(5)\_pt1

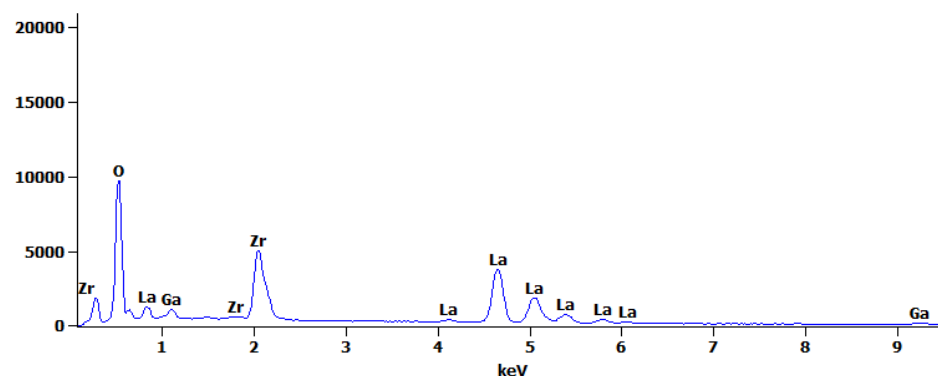

Full scale counts: 19557

Base(5)\_pt2

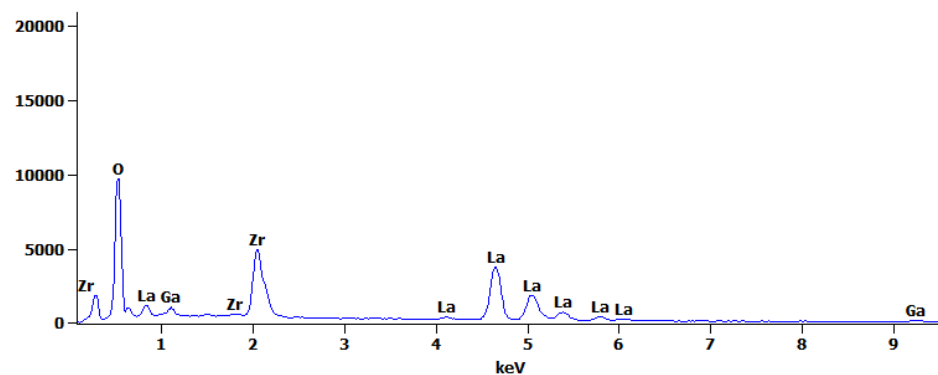

**Supplementary Figure S6.** EDX analysis of  $\text{c-Li}_{6.4}\text{Ga}_{0.2}\text{La}_3\text{Zr}_2\text{O}_{12}$  pellet cross-sectional surface (sintering at 950 °C for 6 hours). EDX Spectra acquired from the selected zones in the cross-sectional image don't show any Al contamination that might result from the alumina crucibles used during the sintering of pellets.

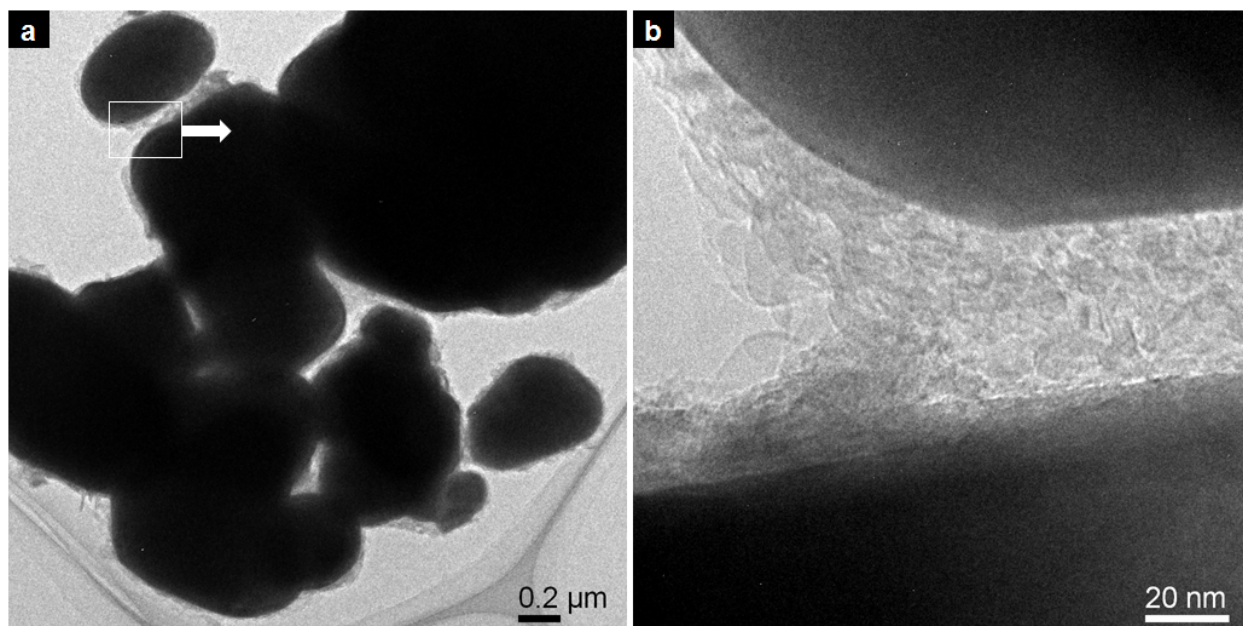

**Supplementary Figure S7.** **a)** Transmission electron microscopy image (TEM) of  $c\text{-Li}_{6.4}\text{Ga}_{0.2}\text{La}_3\text{Zr}_2\text{O}_{12}$  showing particle agglomerates, **b)** the magnified marked region from Figure S5a displaying amorphous inter-granular phases between  $c\text{-Li}_{6.4}\text{Ga}_{0.2}\text{La}_3\text{Zr}_2\text{O}_{12}$  nano-particles.

The presence of amorphous inter-granular phases is shown **Figure S7b**, where the amorphous nano-particles with a lack of order even at 20 nm resolution can be observed. The exact nature of these inter-granular phases couldn't be revealed here, as we were not able to perform HRTEM and SAED from the selected areas due to the instability of particles under e-beam. Nevertheless, the direct evidence of amorphous inter-granular is revealed, and unreacted  $\text{Ga}_2\text{O}_3$ , Li-compounds (e.g.  $\text{Li}_2\text{O}$ ,  $\text{Li}_2\text{CO}_3$ ) that could eventually form in air starting from the exchange of  $\text{Li}^+$  in LLZO structure with  $\text{Ga}^{3+}$ ,  $\text{LiGaO}_2$  and other glassy Ga and Li rich materials could be speculated as the constituents of inter-granular phase

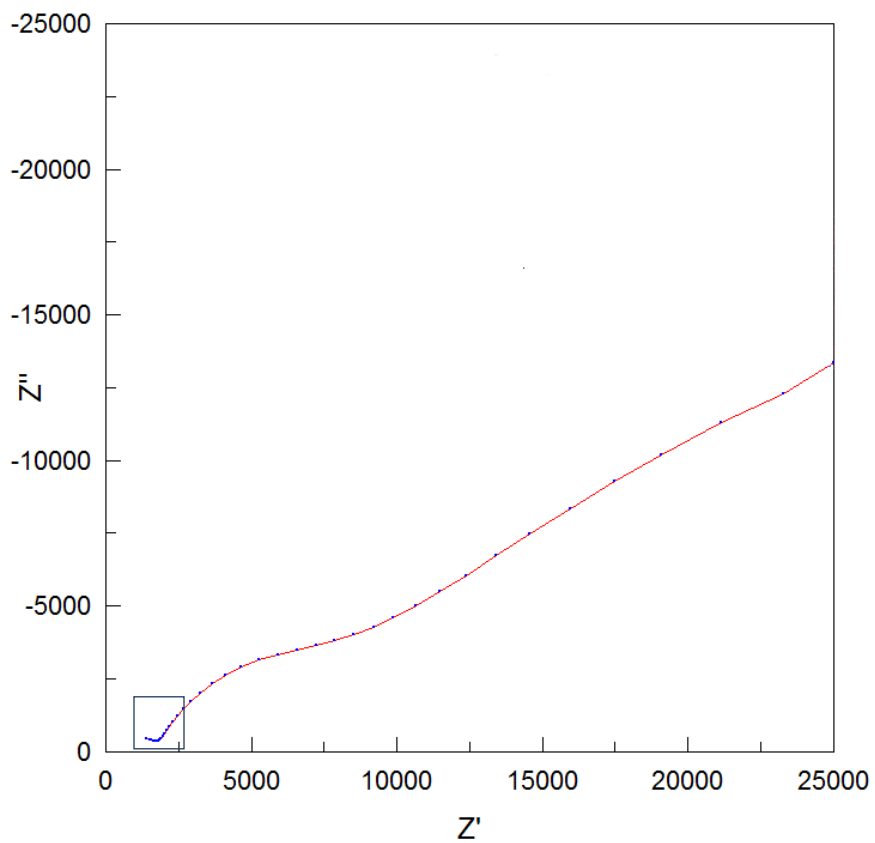

**Supplementary Figure S8.** Nyquist plot obtained from a pellet of  $c\text{-Li}_{6.4}\text{Ga}_{0.2}\text{La}_3\text{Zr}_2\text{O}_{12}$ , exposed to air for  $\sim 2\text{-}3$  hours (after the production of the measurement pellet with electrodes) at RT °C in air using Pt electrodes (1 MHz to 1 Hz).

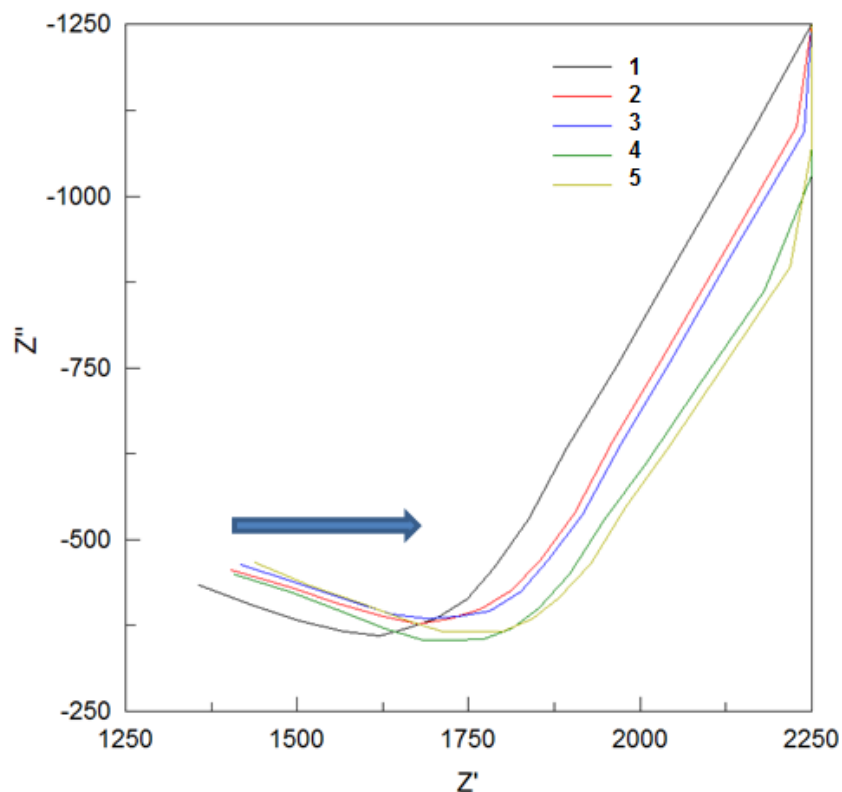

**Supplementary Figure S9.** Consecutive measurements in  $\sim 10$  minutes intervals from the c- $\text{Li}_{6.4}\text{Ga}_{0.2}\text{La}_3\text{Zr}_2\text{O}_{12}$  pellet in Figure S4 displaying the increase in resistance with prolonged air exposure (magnified region in Fig. S4 is shown for consecutively obtained Nyquist plots)

After the production of a pellet of c- $\text{Li}_{6.4}\text{Ga}_{0.2}\text{La}_3\text{Zr}_2\text{O}_{12}$  for AC measurements, it was exposed to air for  $\sim 2$ -3 hours. The Nyquist plot obtained from such a pellet at RT  $^{\circ}\text{C}$  in air using Pt electrodes (1 MHz to 1Hz) is displayed in **Figure S8**. The bulk contribution becomes more apparent with an incomplete semicircle at high frequency for the higher resistive pellet (**Fig. S8**). Consecutive impedance spectra measured from the same pellet with 10 minutes of waiting periods in air are displayed in **Figure S9**. The bulk resistance increases as the pellets are exposed to air for longer period of times that is consistent with the negative effect of humidity on the conductivity that was reported before.

**Supplementary Table 2.** Indexed Powder XRD of  $\text{c-Li}_{6.4}\text{Ga}_{0.2}\text{La}_3\text{Zr}_2\text{O}_{12}$  pellet material (sintered at 950°C) using Werner's algorithm (TREOR).

wavelength : 1.540598

Number of accepted peaks : 25

Crystal system : cubic or lower  
Maximum cell edge : 15.0  
Maximum cell volume : 3000.0  
2Theta window : 0.050

Maximum unindexed lines for refinement : 1

Required Figure of Merit : 5.0

selected solution

|          |         |         |         |        |      |           |
|----------|---------|---------|---------|--------|------|-----------|
| Symmetry | a       | b       | c       | Volume | FOM  | unindexed |
| cubic    | 12.9706 | 12.9706 | 12.9706 | 2182.1 | 25.2 | 0         |

Peak list

| N  | 2Th(obs) | H | K | L | 2Th(calc) | obs-calc | Int   | d(obs)  | d(calc) |
|----|----------|---|---|---|-----------|----------|-------|---------|---------|
| 1  | 16.7194  | 2 | 1 | 1 | 16.7291   | -0.00968 | 67.3  | 5.29827 | 5.29522 |
| 2  | 19.3129  | 2 | 2 | 0 | 19.3402   | -0.02732 | 16.0  | 4.59223 | 4.58579 |
| 3  | 25.6682  | 3 | 2 | 1 | 25.6778   | -0.00957 | 50.2  | 3.46780 | 3.46653 |
| 4  | 27.4782  | 4 | 0 | 0 | 27.4843   | -0.00609 | 46.3  | 3.24335 | 3.24264 |
| 5  | 30.8096  | 4 | 2 | 0 | 30.8043   | 0.00533  | 100.0 | 2.89982 | 2.90031 |
| 6  | 32.3242  | 3 | 3 | 2 | 32.3480   | -0.02379 | 8.9   | 2.76732 | 2.76534 |
| 7  | 33.8110  | 4 | 2 | 2 | 33.8287   | -0.01765 | 73.2  | 2.64895 | 2.64761 |
| 8  | 35.2300  | 5 | 1 | 0 | 35.2543   | -0.02429 | 7.9   | 2.54544 | 2.54374 |
| 9  | 37.9639  | 5 | 2 | 1 | 37.9654   | -0.00147 | 43.8  | 2.36818 | 2.36809 |
| 10 | 42.9382  | 5 | 3 | 2 | 42.9498   | -0.01156 | 38.4  | 2.10465 | 2.10411 |
| 11 | 44.1003  | 6 | 2 | 0 | 44.1233   | -0.02298 | 5.9   | 2.05184 | 2.05083 |
| 12 | 47.5050  | 6 | 3 | 1 | 47.5055   | -0.00045 | 9.0   | 1.91243 | 1.91241 |
| 13 | 48.5899  | 4 | 4 | 4 | 48.5923   | -0.00243 | 9.9   | 1.87223 | 1.87214 |
| 14 | 50.7190  | 6 | 4 | 0 | 50.7136   | 0.00536  | 36.1  | 1.79852 | 1.79870 |
| 15 | 51.7540  | 5 | 5 | 2 | 51.7504   | 0.00363  | 20.1  | 1.76496 | 1.76507 |
| 16 | 52.7630  | 6 | 4 | 2 | 52.7725   | -0.00953 | 63.0  | 1.73356 | 1.73327 |
| 17 | 55.7766  | 7 | 3 | 2 | 55.7602   | 0.01638  | 11.5  | 1.64682 | 1.64727 |
| 18 | 56.7336  | 8 | 0 | 0 | 56.7324   | 0.00117  | 17.8  | 1.62129 | 1.62132 |
| 19 | 59.5734  | 6 | 5 | 3 | 59.5872   | -0.01382 | 4.4   | 1.55061 | 1.55028 |
| 20 | 64.1603  | 8 | 4 | 0 | 64.1710   | -0.01067 | 14.9  | 1.45037 | 1.45015 |
| 21 | 65.9651  | 8 | 4 | 2 | 65.9539   | 0.01120  | 20.3  | 1.41499 | 1.41521 |
| 22 | 66.8492  | 7 | 6 | 1 | 66.8360   | 0.01315  | 8.5   | 1.39841 | 1.39865 |
| 23 | 67.7022  | 6 | 6 | 4 | 67.7124   | -0.01020 | 14.1  | 1.38285 | 1.38267 |
| 24 | 70.3216  | 7 | 6 | 3 | 70.3099   | 0.01169  | 7.3   | 1.33762 | 1.33781 |
| 25 | 73.7175  | 7 | 7 | 2 | 73.7099   | 0.00761  | 4.1   | 1.28417 | 1.28428 |

**Supplementary Table 3.** Indexed Powder XRD of  $\text{c-Li}_{6.4}\text{Ga}_{0.2}\text{La}_3\text{Zr}_2\text{O}_{12}$  pellet material (sintered at 1100°C) using Werner's algorithm (TREOR).

wavelength : 1.540598

Number of accepted peaks : 25

Crystal system : cubic or lower  
Maximum cell edge : 15.0  
Maximum cell volume : 3000.0  
2Theta window : 0.050

Maximum unindexed lines for refinement : 1  
Required Figure of Merit : 5.0

selected solution

|          |         |         |         |        |      |           |
|----------|---------|---------|---------|--------|------|-----------|
| Symmetry | a       | b       | c       | Volume | FOM  | unindexed |
| Cubic    | 12.9584 | 12.9584 | 12.9584 | 2176.0 | 20.6 | 1         |

Peak list

| N  | 2Th(obs) | H  | K | L | 2Th(calc)        | obs-calc | Int   | d(obs)  | d(calc) |
|----|----------|----|---|---|------------------|----------|-------|---------|---------|
| 1  | 16.7440  | 2  | 1 | 1 | 16.7449          | -0.00092 | 100.0 | 5.29053 | 5.29024 |
| 2  | 19.3478  | 2  | 2 | 0 | 19.3586          | -0.01078 | 15.7  | 4.58402 | 4.58148 |
| 3  | 23.6396  |    |   |   | Peak not indexed |          | 8.2   | 3.76059 |         |
| 4  | 25.7019  | 3  | 2 | 1 | 25.7023          | -0.00042 | 69.1  | 3.46334 | 3.46328 |
| 5  | 27.4735  | 4  | 0 | 0 | 27.5106          | -0.03714 | 40.7  | 3.24389 | 3.23960 |
| 6  | 30.8324  | 4  | 2 | 0 | 30.8339          | -0.00155 | 75.8  | 2.89773 | 2.89759 |
| 7  | 32.3732  | 3  | 3 | 2 | 32.3792          | -0.00604 | 8.8   | 2.76324 | 2.76274 |
| 8  | 33.8746  | 4  | 2 | 2 | 33.8614          | 0.01318  | 76.9  | 2.64412 | 2.64512 |
| 9  | 38.0144  | 5  | 2 | 1 | 38.0024          | 0.01196  | 38.7  | 2.36515 | 2.36587 |
| 10 | 43.0014  | 6  | 1 | 1 | 42.9922          | 0.00925  | 35.2  | 2.10170 | 2.10213 |
| 11 | 47.5537  | 6  | 3 | 1 | 47.5529          | 0.00083  | 7.8   | 1.91058 | 1.91061 |
| 12 | 48.6408  | 4  | 4 | 4 | 48.6410          | -0.00017 | 10.1  | 1.87039 | 1.87038 |
| 13 | 50.7647  | 6  | 4 | 0 | 50.7647          | -0.00000 | 27.3  | 1.79701 | 1.79701 |
| 14 | 51.8048  | 5  | 5 | 2 | 51.8026          | 0.00216  | 17.3  | 1.76335 | 1.76341 |
| 15 | 52.8349  | 6  | 4 | 2 | 52.8260          | 0.00891  | 53.2  | 1.73137 | 1.73164 |
| 16 | 55.7936  | 7  | 3 | 2 | 55.8172          | -0.02362 | 10.4  | 1.64636 | 1.64572 |
| 17 | 56.7805  | 8  | 0 | 0 | 56.7906          | -0.01011 | 9.5   | 1.62006 | 1.61980 |
| 18 | 59.6635  | 6  | 5 | 3 | 59.6489          | 0.01459  | 5.1   | 1.54848 | 1.54882 |
| 19 | 64.1908  | 8  | 4 | 0 | 64.2385          | -0.04774 | 15.4  | 1.44975 | 1.44879 |
| 20 | 66.0193  | 8  | 4 | 2 | 66.0238          | -0.00452 | 12.4  | 1.41396 | 1.41388 |
| 21 | 66.9037  | 7  | 6 | 1 | 66.9072          | -0.00345 | 7.0   | 1.39740 | 1.39734 |
| 22 | 67.7856  | 6  | 6 | 4 | 67.7847          | 0.00089  | 13.8  | 1.38135 | 1.38137 |
| 23 | 70.4101  | 7  | 6 | 3 | 70.3858          | 0.02429  | 6.8   | 1.33616 | 1.33656 |
| 24 | 77.1722  | 7  | 6 | 5 | 77.1376          | 0.03458  | 6.2   | 1.23507 | 1.23553 |
| 25 | 79.6028  | 10 | 4 | 0 | 79.6182          | -0.01539 | 9.2   | 1.20335 | 1.20316 |
